# Supplementary material for: Cortical signatures of precision grip force control in children, adolescents, and adults
Source: eLife. 2021 Jun 14;10:e61018. doi: 10.7554/eLife.61018 (PMC8216716; doi:10.7554/eLife.61018)
Supplement: Figure 1—source data 1. [file elife-61018-fig1-data1.xlsx]

## Sheet: Sheet1
ID	Group	Performance
1	G16to18	2.33724
2	G8to10	1.32698
3	G8to10	1.60906
4	G8to10	2.18046
5	G12to14	2.22915
6	G8to10	1.95468
7	G12to14	1.84771
8	G8to10	1.94692
9	G8to10	1.97469
10	G12to14	2.02687
11	G12to14	1.9393
12	G16to18	2.10791
13	G8to10	1.5784
14	G12to14	2.18046
15	G12to14	2.61979
16	G8to10	1.97881
17	G8to10	1.95468
18	G16to18	2.06048
19	G8to10	1.91721
20	G12to14	1.77728
21	G16to18	2.07572
22	G16to18	2.25181
23	G8to10	1.85699
24	G16to18	1.86967
25	G12to14	2.26761
26	G16to18	2.48149
27	G8to10	1.80688
28	G12to14	2.13668
29	G12to14	2.5376
30	G12to14	2.4318
31	G12to14	2.0655
32	G16to18	2.0655
33	G16to18	2.56864
34	G12to14	2.33724
35	G16to18	2.06048
36	G12to14	2.04576
37	G12to14	2.14874
38	G12to14	2.40894
39	G12to14	2.25964
40	G8to10	2.0655
41	G16to18	2.42022
42	G16to18	1.99568
43	G8to10	1.97469
44	G12to14	2.07572
45	G8to10	1.98297
46	G16to18	2.55284
47	G16to18	1.84771
48	G16to18	2.17393
49	G16to18	2.22185
50	G12to14	2.30103
51	G8to10	2.22185
52	G16to18	2.50864
53	G16to18	2.36653
54	G8to10	1.88606
55	G8to10	2.31876
56	G8to10	2.48149
57	G8to10	2.4437
58	G8to10	2.36653
59	G8to10	2.20066
60	G20to30	2.74473
61	G20to30	2.45593
62	G20to30	2.63827
63	G20to30	2.39794
64	G20to30	2.63827
65	G16to18	2.52288
66	G20to30	2.60206
67	G20to30	2.58503
68	G20to30	2.5376
69	G20to30	2.4318
70	G20to30	2.31876
71	G20to30	2.49485
72	G20to30	2.38722
73	G20to30	2.67778
74	G20to30	2.40894
75	G20to30	2.22915
76	G20to30	2.42022
77	G20to30	2.14874
78	G20to30	2.46852
79	G20to30	2.4318
80	G20to30	2.69897
81	G20to30	2.17393
82	G20to30	2.11351
83	G20to30	2.36653
84	G20to30	2.45593
85	G20to30	2.55284
86	G20to30	2.34679
87	G20to30	2.63827
88	G20to30	2.82391
