# Supplementary material for: Cortical signatures of precision grip force control in children, adolescents, and adults
Source: eLife. 2021 Jun 14;10:e61018. doi: 10.7554/eLife.61018 (PMC8216716; doi:10.7554/eLife.61018)
Supplement: Figure 4—source data 1. [file elife-61018-fig4-data1.xlsx]

## Sheet: Sheet1
PEB.matrix	Connection_plot	ConnectionLabels	Pp	Ep_plot	Cp_plot	CI_plot
Common	1	PMv_to_DLPFC	1	-2.9645	0.0865	0.5169
Common	2	SMA_to_DLPFC	1	-2.5192	0.0572	0.3952
Common	3	M1_to_PMv	1	-2.9671	0.0941	0.4868
Common	4	M1_to_SMA	1	-2.5835	0.044	0.3586
Common	5	IPL_to_PMv	1	-2.0661	0.0432	0.3534
Common	6	IPL_to_SMA	1	-2.0343	0.0545	0.3817
Common	7	DLPFC_to_PMv	1	-0.8688	0.0349	0.3131
Common	8	DLPFC_to_SMA	1	-1.7169	0.0641	0.4184
Common	9	PMv_to_M1	1	-1.2743	0.0464	0.3653
Common	10	PMv_to_IPL	1	-0.7118	0.0218	0.2465
Common	11	SMA_to_M1	1	-1.2885	0.022	0.2402
Common	12	SMA_to_IPL	1	-1.7564	0.0325	0.2886
Common	13	PMv_to_SMA	1	-0.8487	0.0222	0.2677
Common	14	SMA_to_PMv	0.8888	0	0	0
InterAct	1	PMv_to_DLPFC	1	0.3971	0.0326	0.3154
InterAct	2	SMA_to_DLPFC	0	0	0	0
InterAct	3	M1_to_PMv	0	0	0	0
InterAct	4	M1_to_SMA	0	0	0	0
InterAct	5	IPL_to_PMv	0	0	0	0
InterAct	6	IPL_to_SMA	0	0	0	0
InterAct	7	DLPFC_to_PMv	0	0	0	0
InterAct	8	DLPFC_to_SMA	0.6971	0	0	0
InterAct	9	PMv_to_M1	0	0	0	0
InterAct	10	PMv_to_IPL	0	0	0	0
InterAct	11	SMA_to_M1	1	0.3051	0.0114	0.1801
InterAct	12	SMA_to_IPL	0	0	0	0
InterAct	13	PMv_to_SMA	0.517	0	0	0
InterAct	14	SMA_to_PMv	0	0	0	0
AgeGroup	1	PMv_to_DLPFC	0	0	0	0
AgeGroup	2	SMA_to_DLPFC	0	0	0	0
AgeGroup	3	M1_to_PMv	0	0	0	0
AgeGroup	4	M1_to_SMA	0	0	0	0
AgeGroup	5	IPL_to_PMv	0	0	0	0
AgeGroup	6	IPL_to_SMA	0	0	0	0
AgeGroup	7	DLPFC_to_PMv	0	0	0	0
AgeGroup	8	DLPFC_to_SMA	0	0	0	0
AgeGroup	9	PMv_to_M1	0	0	0	0
AgeGroup	10	PMv_to_IPL	0	0	0	0
AgeGroup	11	SMA_to_M1	0	0	0	0
AgeGroup	12	SMA_to_IPL	1	1.481	0.0527	0.3876
AgeGroup	13	PMv_to_SMA	0	0	0	0
AgeGroup	14	SMA_to_PMv	0	0	0	0
Performance	1	PMv_to_DLPFC	0.5929	0	0	0
Performance	2	SMA_to_DLPFC	0.7712	0	0	0
Performance	3	M1_to_PMv	0.5156	0	0	0
Performance	4	M1_to_SMA	0	0	0	0
Performance	5	IPL_to_PMv	1	-2.0027	0.5511	1.1869
Performance	6	IPL_to_SMA	0.6373	0	0	0
Performance	7	DLPFC_to_PMv	0	0	0	0
Performance	8	DLPFC_to_SMA	0	0	0	0
Performance	9	PMv_to_M1	0	0	0	0
Performance	10	PMv_to_IPL	1	1.8864	0.3216	0.9192
Performance	11	SMA_to_M1	0.8157	0	0	0
Performance	12	SMA_to_IPL	0	0	0	0
Performance	13	PMv_to_SMA	0	0	0	0
Performance	14	SMA_to_PMv	0	0	0	0
