# Supplementary material for: Cortical signatures of precision grip force control in children, adolescents, and adults
Source: eLife. 2021 Jun 14;10:e61018. doi: 10.7554/eLife.61018 (PMC8216716; doi:10.7554/eLife.61018)
Supplement: Figure 5—source data 1. — This data is also used for Figure 6. [file elife-61018-fig5-data1.xlsx]

## Sheet: Sheet1
ID	Group	Age	Performance	PMv_to_DLPFC	SMA_to_M1	SMA_to_IPL	IPL_to_PMv	PMv_to_IPL
1	G16to18	193	2.33724	-0.5668	-0.3954	-0.4075	-0.3944	0.0699
2	G8to10	96	1.32698	-0.4913	0.7032	-0.2848	-0.1948	-0.4152
3	G8to10	119	1.60906	0.0502	0.3008	-0.5909	-0.5244	-0.9474
4	G8to10	107	2.18046	-0.3616	-1.0224	-0.8567	-1.0617	-0.2416
5	G12to14	162	2.22915	-0.9819	-0.5882	-0.4074	-0.5622	0.5741
6	G8to10	109	1.95468	-0.8845	-0.5855	-0.4783	-0.1736	0.5851
7	G12to14	145	1.84771	-0.5969	-0.2289	-0.4239	-0.599	-0.4515
8	G8to10	111	1.94692	-0.3687	-1.0347	-1.0542	-0.7706	-0.1501
9	G8to10	107	1.97469	-0.8891	-0.5506	-0.7269	-0.0877	-0.5179
10	G12to14	166	2.02687	-0.7877	-0.6715	-0.5976	-1.118	-0.6215
11	G12to14	161	1.9393	-0.7486	0.2059	-0.8045	-0.4513	-0.5394
12	G16to18	212	2.10791	-0.7526	-0.6132	0.0063	-1.2247	-0.3309
13	G8to10	109	1.5784	-0.3199	0.7346	-0.4414	-0.4948	-0.8265
14	G12to14	163	2.18046	-0.6923	-0.7608	-1.0846	-0.9491	0.3681
15	G12to14	144	2.61979	-0.9267	-0.8788	-1.2624	-0.7757	0.1567
16	G8to10	117	1.97881	-0.569	-0.6276	-0.6274	-0.8184	-1.0769
17	G8to10	96	1.95468	-0.2063	-0.4965	0.2078	-0.8296	-0.9394
18	G16to18	202	2.06048	-0.7589	-0.8058	-0.6162	-0.4962	-0.3565
19	G8to10	117	1.91721	-0.6061	-0.2868	-0.7266	-0.5573	-0.4359
20	G12to14	155	1.77728	-0.8153	0.1569	-0.7104	-0.0189	-0.8363
21	G16to18	207	2.07572	-0.8145	-0.4254	-0.7897	-0.8382	0.0529
22	G16to18	206	2.25181	0.3364	1.0352	-0.3774	-0.9484	-0.5093
23	G8to10	96	1.85699	-0.7054	-0.5575	-0.3227	-0.8009	-0.3376
24	G16to18	211	1.86967	-0.8372	-0.258	0.2844	-1.0851	-0.8265
25	G12to14	151	2.26761	-0.6516	-0.509	-0.8003	-0.686	-0.0078
26	G16to18	212	2.48149	0.0524	0.7936	-0.3616	-1.1715	-0.0855
27	G8to10	105	1.80688	-0.7246	-0.9113	-0.593	-0.5784	-0.5093
28	G12to14	154	2.13668	-0.0532	-0.1307	-0.7064	-0.9128	-0.0846
29	G12to14	159	2.5376	-1.0168	-0.7498	-1.0424	-0.4641	0.0633
30	G12to14	164	2.4318	-0.3593	-0.048	-1.0795	-1.1151	0.6614
31	G12to14	161	2.0655	-0.0615	0.1007	-0.3083	-0.4332	0.0852
32	G16to18	208	2.0655	-0.9165	-0.5126	-0.3536	-1.0232	-0.518
33	G16to18	204	2.56864	0.1152	0.5202	-0.2956	-1.0643	-0.6193
34	G12to14	164	2.33724	0.2268	0.1031	-1.0699	-0.9203	0.4039
35	G16to18	200	2.06048	-0.1976	0.2501	-0.3488	-0.6772	0.0857
36	G12to14	155	2.04576	-0.8989	-0.5223	-0.8581	-0.9893	-0.0806
37	G12to14	145	2.14874	-0.7445	-0.7439	-0.9979	-0.7106	-0.4213
38	G12to14	161	2.40894	-0.7918	0.3515	-0.9675	-1.0773	0.0927
39	G12to14	151	2.25964	0.1226	-0.8244	-0.7074	-0.6411	-0.6386
40	G8to10	112	2.0655	-0.7912	0.9253	-1.0836	-0.7742	-0.8759
41	G16to18	215	2.42022	-0.436	-0.4895	0.0838	-1.0612	0.1211
42	G16to18	205	1.99568	-0.8913	-0.8033	-0.4105	-1.0716	-0.7891
43	G8to10	117	1.97469	-0.6496	-0.3308	-1.0155	-0.623	-0.4771
44	G12to14	152	2.07572	-0.8431	-0.4616	0.2515	-0.9369	-0.173
45	G8to10	113	1.98297	-0.8727	-0.5422	-0.9621	0.3065	-0.2328
46	G16to18	207	2.55284	0.426	-0.6259	-0.2682	-0.6997	1.3487
47	G16to18	194	1.84771	-0.2078	-0.4752	0.3556	-0.5186	-0.4075
48	G16to18	195	2.17393	-0.6718	-0.4838	-0.2551	-0.9618	0.7374
49	G16to18	214	2.22185	-0.5843	-0.4631	0.3227	-1.1558	0.2749
50	G12to14	159	2.30103	-0.938	-0.9433	-1.0231	-0.8353	-0.2739
51	G8to10	113	2.22185	-0.9962	-0.8045	-0.962	-0.8021	0.5795
52	G16to18	212	2.50864	-0.4842	-0.0638	-0.5419	-0.4343	0.1506
53	G16to18	212	2.36653	0.1444	-0.5811	0.2939	-1.149	0.0606
54	G8to10	98	1.88606	-0.3505	-0.4583	-0.8761	-0.6047	-0.7368
55	G8to10	110	2.31876	-0.6284	-0.9525	-1.1736	-0.4584	0.2542
56	G8to10	113	2.48149	-1.0242	-0.4527	-1.4333	-1.2608	1.1578
57	G8to10	106	2.4437	-1.4039	-0.7516	-1.6269	-0.2622	-0.5176
58	G8to10	109	2.36653	-1.0878	-0.8237	-1.1782	-1.0394	0.1967
59	G8to10	97	2.20066	-1.0639	-0.9419	-1.0045	-0.5351	-0.3556
60	G20to30	270	2.74473	0.6257	-0.2204	-0.2931	-1.5573	0.3909
61	G20to30	310	2.45593	-0.3157	-0.2963	-0.0605	-1.1564	0.3368
62	G20to30	265	2.63827	0.1691	-0.0607	-0.2633	-1.2172	0.83
63	G20to30	241	2.39794	-0.2169	-1.061	0.593	-1.1341	0.1872
64	G20to30	304	2.63827	-0.0226	0.2623	-0.6013	-1.1072	0.8457
65	G16to18	212	2.52288	-0.483	-0.6214	-0.4087	-0.1554	0.6326
66	G20to30	337	2.60206	-0.1382	-0.4108	-0.187	-1.117	1.9672
67	G20to30	323	2.58503	-0.0828	-0.0808	-0.0208	0.7304	0.5696
68	G20to30	269	2.5376	0.0302	-0.2306	-0.079	-0.7229	0.5307
69	G20to30	267	2.4318	-0.4658	-0.6217	-0.2492	-1.715	0.3291
70	G20to30	302	2.31876	-0.5295	-0.8825	-0.0754	-0.8414	0.6328
71	G20to30	301	2.49485	0.1703	-0.0607	-0.0709	-1.272	0.9342
72	G20to30	318	2.38722	1.7394	-0.2611	-0.1952	-0.9379	0.0526
73	G20to30	318	2.67778	0.0295	-0.3403	-0.4675	-1.3559	1.101
74	G20to30	337	2.40894	0.338	-0.5308	0.9546	-1.1103	0.5708
75	G20to30	261	2.22915	-0.8575	-0.459	-0.3188	-1.3488	-0.0179
76	G20to30	306	2.42022	-0.0407	-0.4808	0.1729	-1.5034	0.0168
77	G20to30	271	2.14874	-0.4682	0.2652	-0.2568	-0.2802	0.8892
78	G20to30	261	2.46852	-0.342	-0.3007	0.6109	-1.247	1.3797
79	G20to30	244	2.4318	0.2286	-0.7234	-0.3806	-0.6799	0.2483
80	G20to30	334	2.69897	0.4741	0.4757	0.4509	-0.5242	0.524
81	G20to30	317	2.17393	-1.1266	0.2417	-0.025	-0.2123	1.0734
82	G20to30	360	2.11351	-0.1297	0.4535	-0.1314	-0.5751	0.147
83	G20to30	332	2.36653	0.0854	-0.3982	-0.2025	-1.0964	-0.1813
84	G20to30	275	2.45593	0.0165	0.068	-0.0143	-0.6856	0.7764
85	G20to30	357	2.55284	-0.0628	-0.3463	-0.4427	-0.8935	0.8764
86	G20to30	355	2.34679	0.0019	-0.1961	-0.4351	-1.0184	-0.36
87	G20to30	305	2.63827	-0.0801	-0.6953	-0.3126	-1.2374	0.2937
88	G20to30	299	2.82391	0.1391	-0.246	-0.4414	-0.5669	0.4816
